# Supplementary material for: Glutamine Synthetase Shields Triple-negative Breast Cancer Cells from Ferroptosis in Metastasis Triggered by Glutamine Deprivation
Source: Research Square preprint supplement (doi:10.21203/rs.3.rs-6439513/v1), 2025-04-30
Supplement: Supplementary file 1 [file 022cb7869f692200e6f6f19d.xlsx]

## Sheet: Sheet1
List of antibodies used for western blotting and IF.
Antibodies Clone Source Cat#	Source	Cat#	Dilution ratio
Anti-Glutamine Syntheyase [EPR13022(B)]	Abcam	ab176562	1:5000
Anti-E-Cadherin [EP700Y]	Abcam	ab40772	1:5000
Anti-Snail [EPR21043]	Abcam	ab216347	1:2000
Anti-Lipocalin-2/NGAL [EPR5048]	Abcam	ab125075	1:3000
Anti-Transferrin Receptor antibody [EPR20584]	Abcam	ab214039	1:3000
Phospho-mTORC1(Ser2448) (D9C2)	Cell Signaling	# 5536S	1:1000
anti-MMP-2 [EPR1184]	Abcam	ab92536	1:5000
Anti-MMP7 [EPR17888-71]	Abcam	ab207299	1:5000
Anti-VEGFA [EPR20705]	Abcam	ab214424	1:5000
Anti-ACSL4/FACL4 (22401-1-AP)	Proteintech	22401-1-AP	1:5000
Anti-beta Actin [mAbcam 8226]	Abcam	ab8226	1:10000
Anti-Glutathione Peroxidase 4[EPNCIR144]	Abcam	(ab125066)	1:5000
