# Supplementary material for: Glutamine Synthetase Shields Triple-negative Breast Cancer Cells from Ferroptosis in Metastasis Triggered by Glutamine Deprivation
Source: Research Square preprint supplement (doi:10.21203/rs.3.rs-6439513/v1), 2025-04-30
Supplement: Supplementary file 1 [file 627d7ed0e51a5cc55845155f.docx]

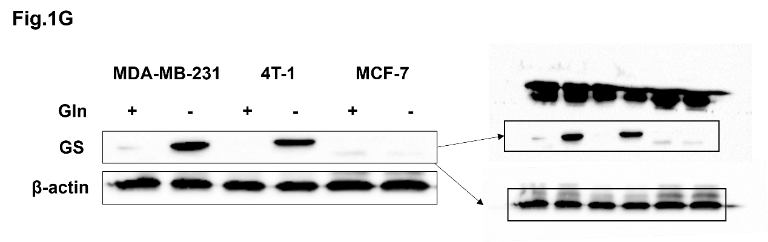


(G) Expression of GS was analyzed in MDA-MB-231, 4T-1, and MCF-7 cell lines after 36 h of exposure to either Gln+ or Gln- medium.


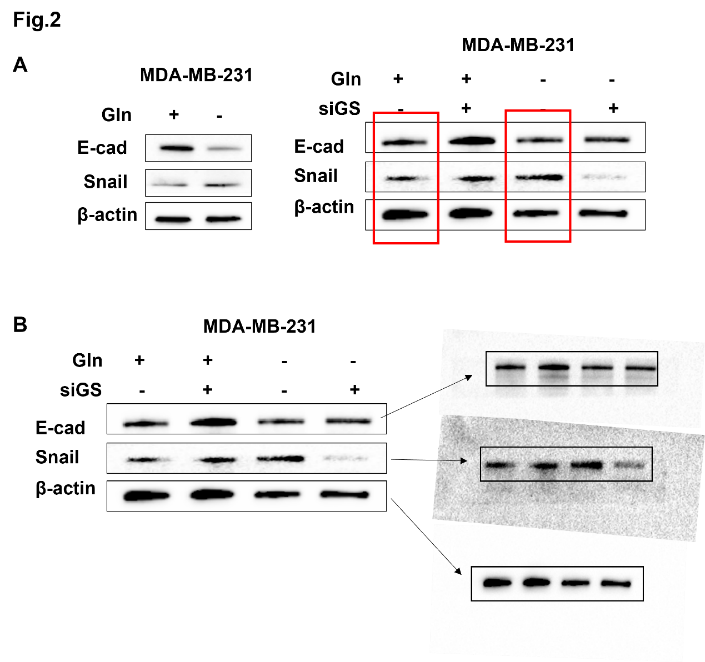


(A) Protein expression of E-cad and Snail in MDA-MB-231 cells cultured in either Gln+ or Gln- was analyzed using western blotting. (B) Immunoblotting was performed to evaluate the protein expression of E-cad and Snail in MDA-MB-231 cells transfected with GS siRNA and cultured in Gln- medium for 36 h compared with the control cells.

Figure 2B represent biological replicates conducted under identical conditions (same antibody batch, detection system, and protocol) as those in Figure 2A.


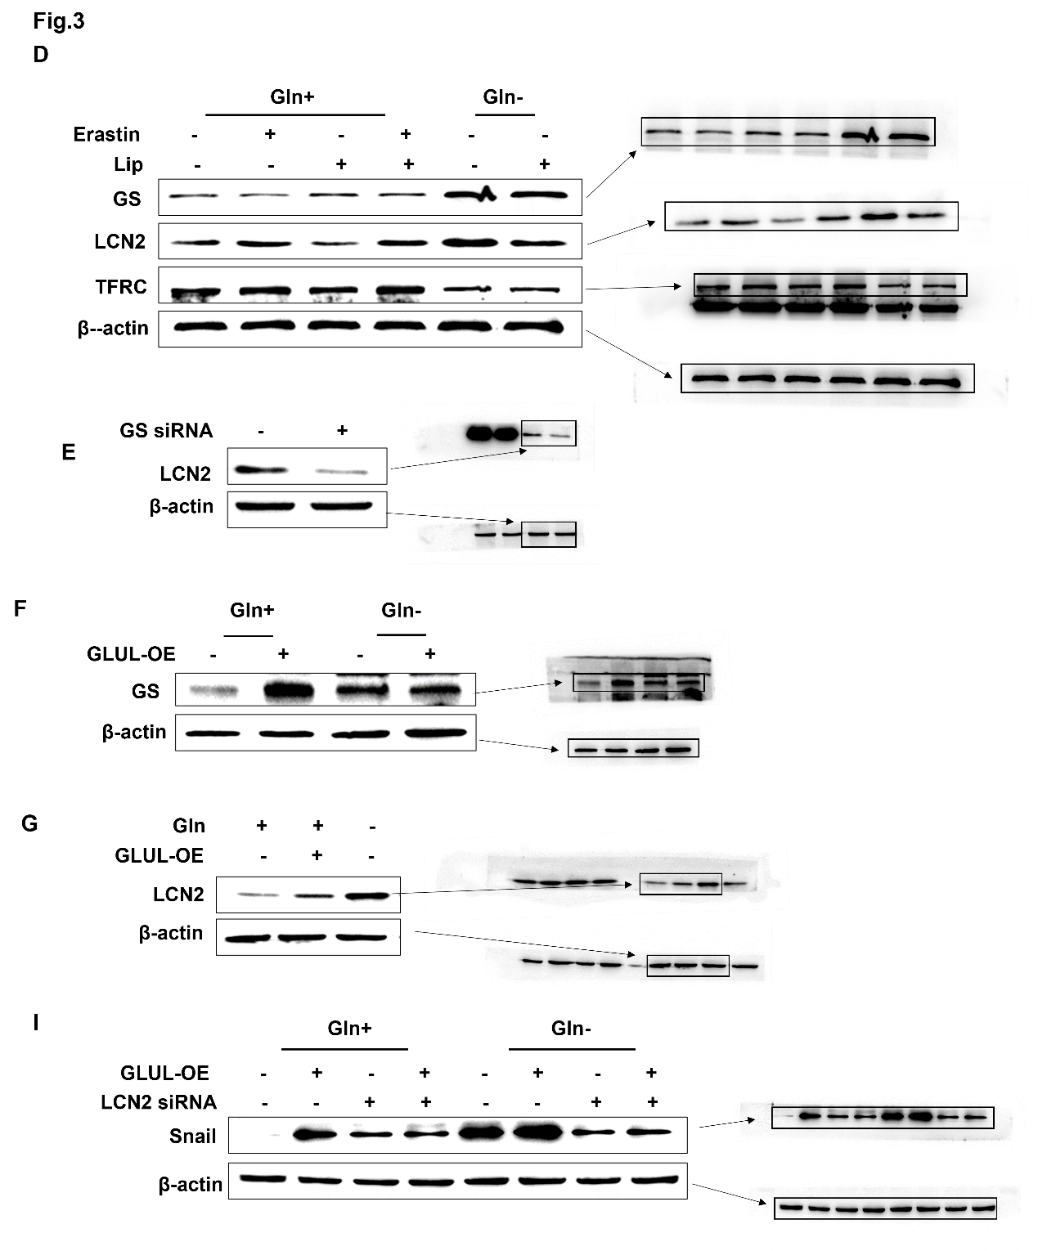


(D) Western blotting was used to analyze the protein expression levels of GS, LCN2, and TRFC in MDA-MB-231 cells that underwent lipid peroxidation induced by Erastin (Gln+) or Gln deprivation. (E) The impact of GS knockdown on LCN2 protein expression was investigated. (F) MDA-MB-231 cells were transfected with vectors harboring a plasmid for GS overexpression and subsequently verified through immunoblotting. (G) The protein expression of LCN2 was assessed in MDA-MB-231 cells with either GS overexpression plasmid or Gln deprivation. (I) Western blot analysis of cellular lysates of GS-overexpressing and LCN2-knockdown MDA-MB-231 cells under non-starvation and Gln starvation conditions.


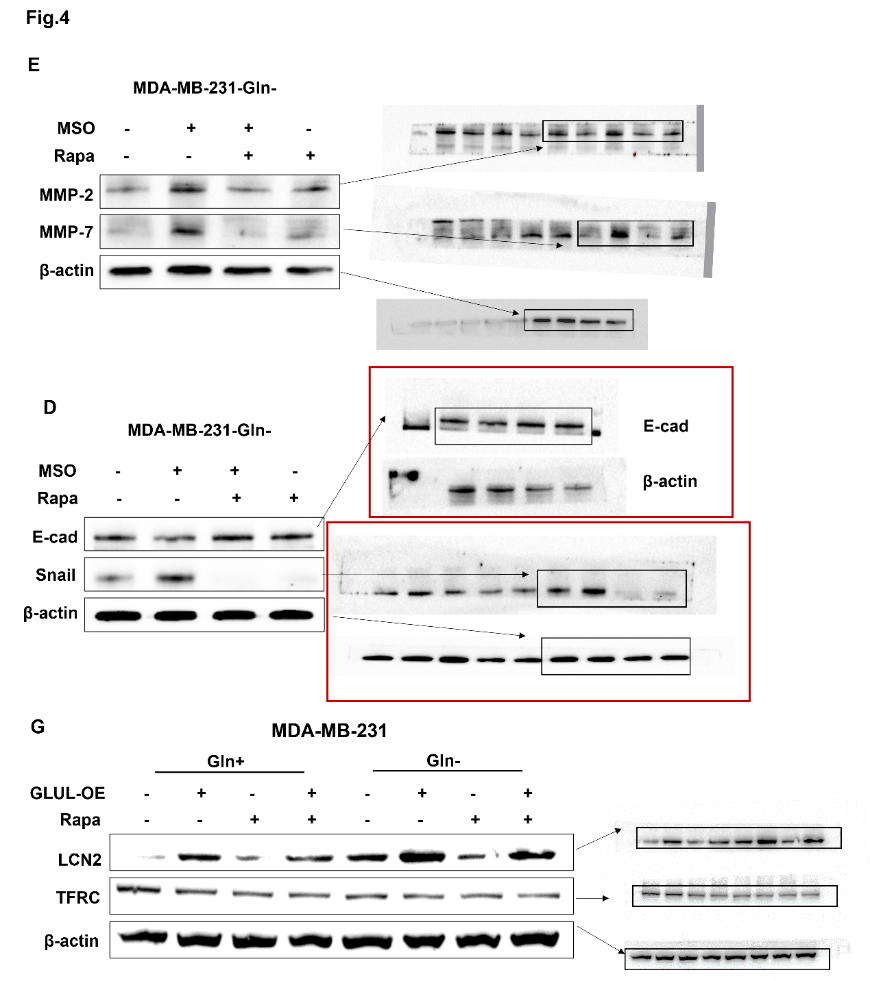


(D-E) The expression of EMT-related genes (E-cad and Snail) and MMPs (MMP-2 and MMP-7) in MDA-MB-231 cells under Gln-free conditions treated with 100 nM rapamycin (Rapa) and/or 3 mM MSO for 24 h was assessed using immunoblotting. (G) The effects of Rapa on the inhibition of LCN2 and TFRC induced by Gln deprivation and GS overexpression were investigated using western blot analysis.


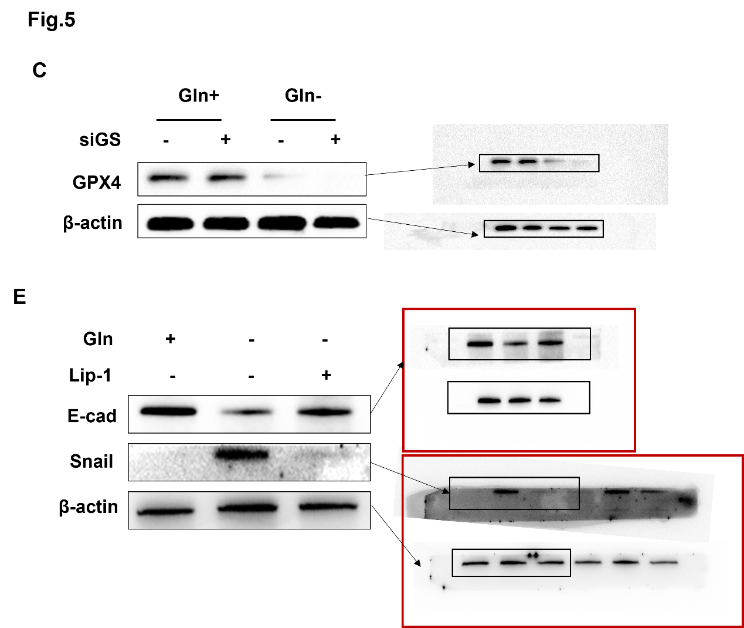


(C) GPX4 protein expression in MDA-MB-231 cells. (E) Immunoblotting was performed to examine the expression of E-cad and Snail in MDA-MB-231 cells cultured in either Gln-replete or Gln-free medium for 36 h, followed by treatment with Lip-1 for 24 h. β-actin was used as the loading control.


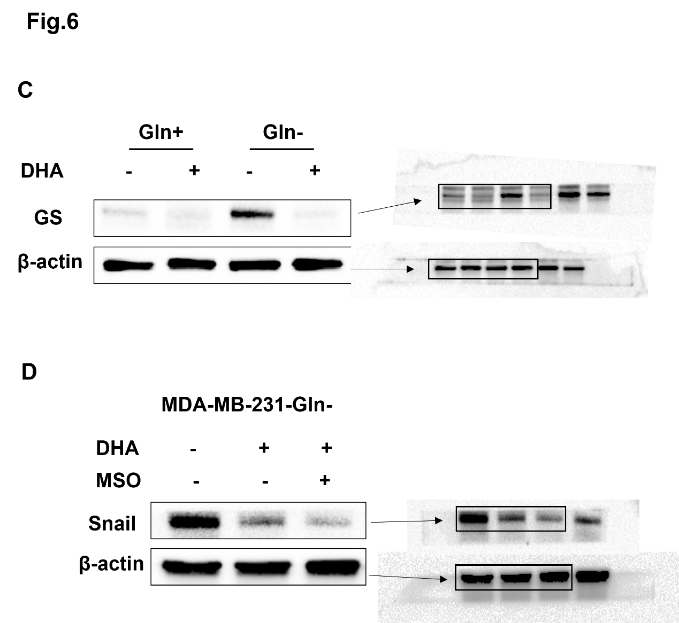


(C) The protein expression of GS in MDA-MB-231 cells was assessed using immunoblotting after treatment with either vehicle (H2O) or 100 µM DHA in a Gln-replete or Gln-free medium for a duration of 24 h. (D) Snail expression in MDA-MB-231 cells was analyzed through western blotting after treatment with 100 µM DHA and/or 3 mM MSO under Gln starvation conditions.


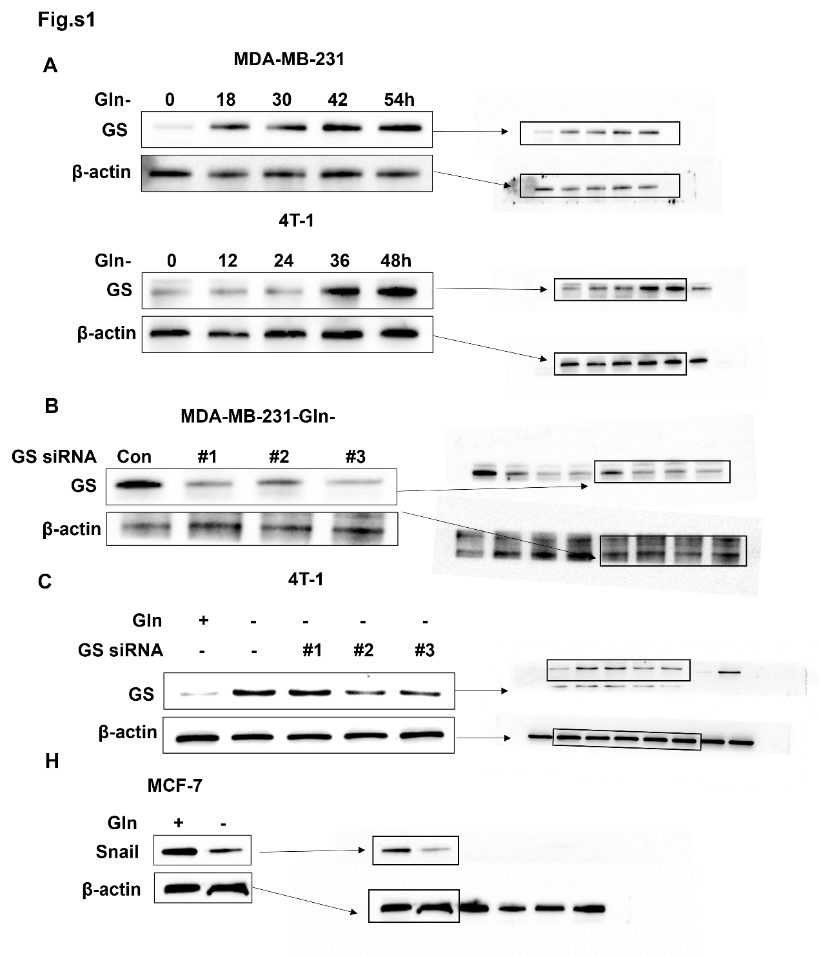


(A) Immunoblot analysis of GS and β-actin was performed in MDA-MB-231 and 4T-1 cells under normal conditions and during different periods of Gln starvation. (B-C) MDA-MB-231 cells (human) and 4T-1 cells (mouse) were cultured in a Gln-free medium for 24 h and subsequently transfected with GS siRNA for an additional 24 h. The expression of GS in siGS-infected cells was determined using Western blotting analysis, with β-actin serving as a loading control. (H) The expression of Snail in MCF-7 cells was also examined.


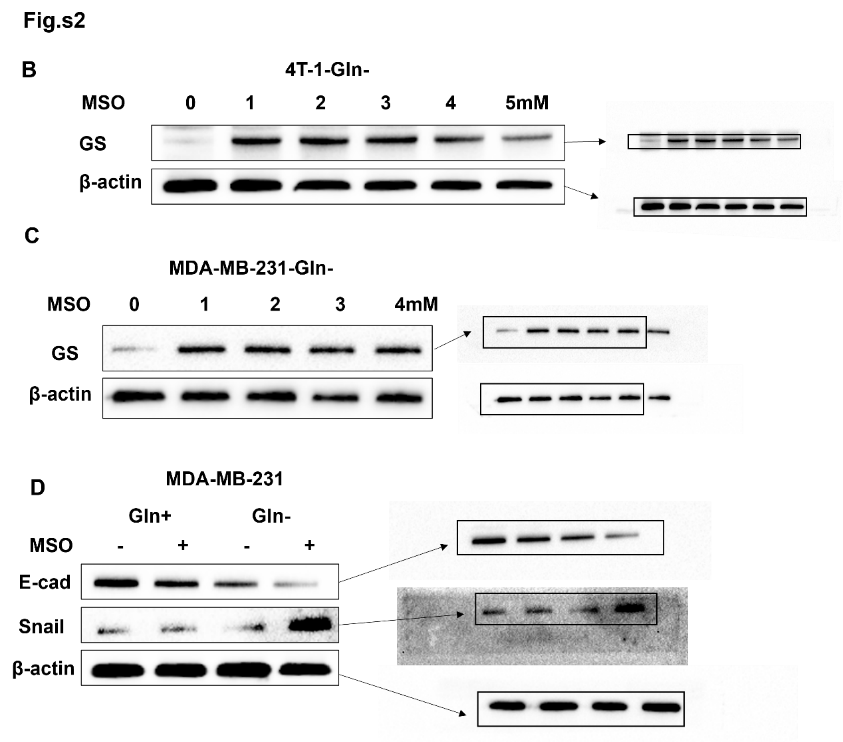


(B, C) GS expression was evaluated after treating the cells with various concentrations of MSO under Gln starvation for 36 h. (D) Immunoblotting was performed to analyze the protein expression of E-cad and Snail in MDA-MB-231 cells treated with vehicle (H2O) or 3 mM MSO in Gln-replete or Gln-free medium for 24 h.


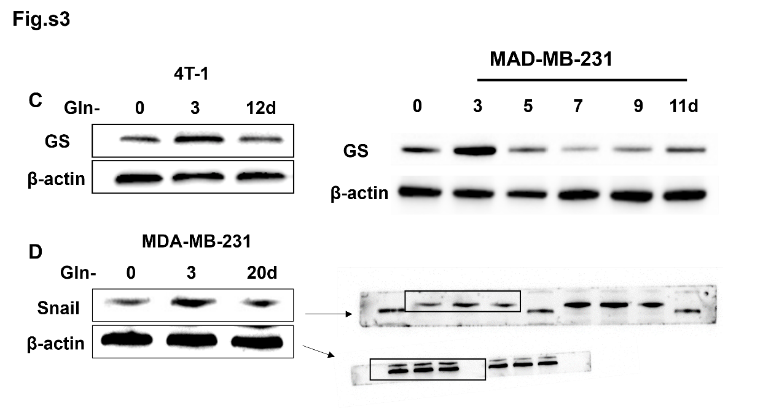


(C) The expression of GS in 4T-1 cells cultured in Gln-replete or Gln-free medium for 3 and 12 days was analyzed by immunoblotting. (D) The expression of Snail in MDA-MB-231 cells cultured in Gln-replete and Gln-free medium for 3 or 20 days as examined by immunoblotting.


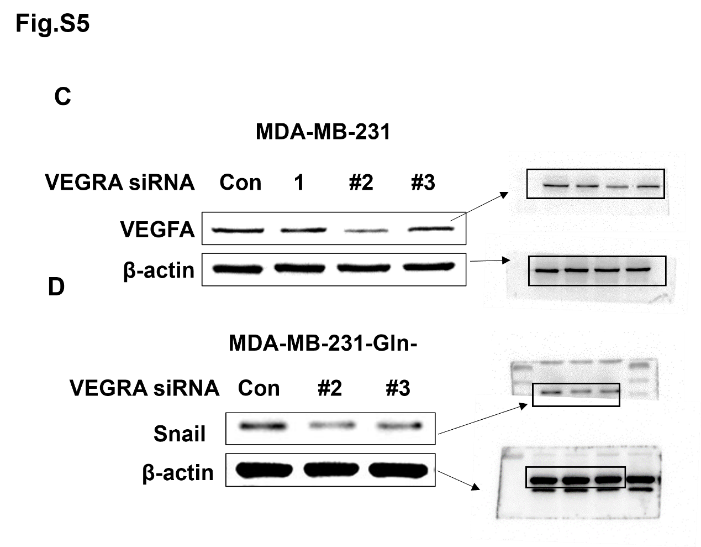


(C) Immunoblotting verifying VEGFA knockdown. (D) Snail expression levels in GS knockdown cells with Gln deprivation.


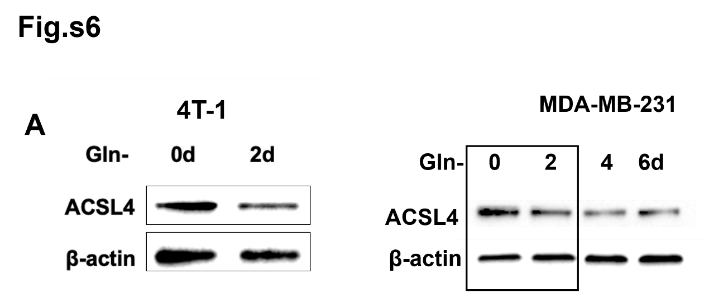


(A) The protein expression levels of ACSL4 and β-actin as evaluated using immunoblotting in 4T-1 cells with and without Gln supplementation.

Although we were unable to retrieve the specific raw data files for this figure from our archives, we rigorously repeated the experiment in another cell line (MDA-MB-231) under standardized conditions. The replicated results demonstrated consistent trends (right). This methodological consistency across different biological systems further corroborates the reliability of our findings.
