# Supplementary material for: Glutamine Synthetase Shields Triple-negative Breast Cancer Cells from Ferroptosis in Metastasis Triggered by Glutamine Deprivation
Source: Research Square preprint supplement (doi:10.21203/rs.3.rs-6439513/v1), 2025-04-30
Supplement: Supplementary file 2 [file 39a5c9ce12d73d5efc3fc769.xlsx]

## Sheet: Sheet1
List of mouse specific siRNAs.
Name	sense (5＇-3＇)	antisense (5＇-3＇)
GLUL siRNA1	GAGGCACAUCUGUAAACGGAUTT	AUCCGUUUACAGAUGUGCCUCTT
GLUL siRNA2	CGAACCCUUCCAAUACAAGAATT	UUCUUGUAUUGGAAGGGUUCGTT
GLUL siRNA3	CCAUACCAACUUCAGCACCAATT	UUGGUGCUGAAGUUGGUAUGGTT
