# Supplementary material for: Glutamine Synthetase Shields Triple-negative Breast Cancer Cells from Ferroptosis in Metastasis Triggered by Glutamine Deprivation
Source: Research Square preprint supplement (doi:10.21203/rs.3.rs-6439513/v1), 2025-04-30
Supplement: Supplementary file 2 [file befccfb65c3b53d629de0975.docx]

**Supplementary Fig. 1. Promotion of the characteristic trait of ferroptosis as observed in GS knockdown.** (A) Immunoblot analysis of GS and β-actin was performed in MDA-MB-231 and 4T-1 cells under normal conditions and during different periods of Gln starvation. (B-C) MDA-MB-231 cells (human) and 4T-1 cells (mouse) were cultured in a Gln-free medium for 24 h and subsequently transfected with GS siRNA for an additional 24 h. The expression of GS in siGS-infected cells was determined using Western blotting analysis, with β-actin serving as a loading control. (D) The cytotoxicity of Erastin was assessed using the CCK-8 assay after 24 h in Gln-starved cells that had been transfected with GS siRNA for 24 h. (E-G) The dose-dependent cytotoxicity of Erastin/RSL3 in MCF-7 and RSL3 in BT474 cells was evaluated under Gln+ and Gln- starvation conditions for 36 h. (H) The expression of Snail in MCF-7 cells was also examined.

**Supplementary Fig. 2. GS mediates ferroptosis-resistance and EMT processes in a non-catalytic manner.** (A) The activity levels of GS were measured in MDA-MB-231 cells subjected to Gln starvation for 12 h, followed by treatment with MSO or transfection with siGS for 24 h. (B, C) GS expression was evaluated after treating the cells with various concentrations of MSO under Gln starvation for 36 h. (D) Immunoblotting was performed to analyze the protein expression of E-cad and Snail in MDA-MB-231 cells treated with vehicle (H2O) or 3 mM MSO in Gln-replete or Gln-free medium for 24 h. (E-F) The dose-dependent cytotoxicity of RSL3 was assessed in TNBC cell lines treated with 3 mM MSO under Gln starvation for 36 h using the CCK-8 assay. (G, H) The dose-dependent cytotoxicity of Erastin or RSL3 was assessed in MCF-7 cells treated with 3 mM MSO under Gln starvation for 36 h using the CCK-8 assay.

**Supplementary Fig. 3. Long-term Gln deprivation partly reverses the effects of resistance to ferroptosis.** (A-B) The cytotoxicity of Erastin in 4T-1 cells and MDA-MB-231 cells under Gln deprivation for 0, 2–3, and > 10 days was assessed using the CCK-8 assay. (C) The expression of GS in 4T-1 cells cultured in Gln-replete or Gln-free medium for 3 and 12 days was analyzed by immunoblotting. (D) The expression of Snail in MDA-MB-231 cells cultured in Gln-replete and Gln-free medium for 3 or 20 days as examined by immunoblotting.

**Supplementary Fig. 4. GS-mediated iron metabolism regulators are critical for breast cancer prognosis.** (A–C) Kaplan-Meier survival plots demonstrate the impact of NUPR1, LCN2, and TFRC on OS in breast cancer patients. (D, E) Variations in the expression levels of LCN2 and TFRC were observed across different subclasses of breast cancer, including luminal, HER-2, and TNBC. **P < 0.01, ****P < 0.0001.

**Supplementary Fig. 5. GS protects ferroptosis from SREBP1/SCD1 and promotes EMT through VEGFA.** (A) Volcano plot representing the differential expression of VEGFA in MDA-MB-231 cells with or without Gln deprivation. (B) The mRNA expression levels of VEGFA assessed using qPCR in MDA-MB-231 cells subjected to Gln deprivation and Gln deprivation cells. (C) Immunoblotting verifying VEGFA knockdown. (D) Snail expression levels in GS knockdown cells with Gln deprivation. (E) The cell viability of MDA-MB-231 and 4T-1 cells under Gln-free conditions, with or without 200 nM Rapa treatment, was determined using a CCK-8 assay after treatment with 3 mM MSO for 24 h. (F) The CCK-8 assay was used to assess the dose-dependent cytotoxicity of RSL3 in MDA-MB-231 cells treated with 3 mM MSO and 2 µM Betulin under Gln starvation (Gln-) for 36 h. (G) The dose-dependent cytotoxicity of Erastin was evaluated in MDA-MB-231 cells treated with 3 mM MSO and SCD1 siRNA.

**Supplementary Fig. 6. The sensitivity of cells to ferroptosis under Gln starvation is sustained by silencing ACLS4.** (A) The protein expression levels of ACSL4 and β-actin as evaluated using immunoblotting in 4T-1 cells with and without Gln supplementation. (B-C) The cytotoxic effects of RSL3 were assessed in a dose-dependent manner in cells transfected with ACSL4 siRNA, comparing Gln+ and Gln- culture media after 48 h. Data are presented as mean ± SEM. (D–G) Dose-dependent cytotoxicity of FINO2 and DHA as evaluated in cells transfected with ACSL4 siRNA, comparing Gln-replete and Gln-free culture media after 48 h when compared to the control group.
