# Supplementary material for: Glutamine Synthetase Shields Triple-negative Breast Cancer Cells from Ferroptosis in Metastasis Triggered by Glutamine Deprivation
Source: Research Square preprint supplement (doi:10.21203/rs.3.rs-6439513/v1), 2025-04-30
Supplement: Supplementary file 4 [file a9bbe45b00c7b94f422bfcd7.xlsx]

## Sheet: Sheet1
List of human specific siRNAs.
Name	sense (5＇-3＇)	antisense (5＇-3＇)
GLUL siRNA1	CCAGGAGAAGAAGGGUUACUUTT	AAGUAACCCUUCUUCUCCUGGTT
GLUL siRNA2	CGAACCCUUCCAAUACAAGAATT	UUCUUGUAUUGGAAGGGUUCGTT
GLUL siRNA3	CCAUACCAACUUCAGCACCAATT	UUGGUGCUGAAGUUGGUAUGGTT
VEGFA siRNA1	AGGGCAGAAUCAUCACGAAGUTT	ACUUCGUGAUGAUUCUGCCCUTT
VEGFA siRNA2	GAGCGGAGAAAGCAUUUGUUUTT	AAACAAAUGCUUUCUCCGCUCTT
VEGFA siRNA3	AUGCGGAUCAAACCUCACCAATT	UUGGUGAGGUUUGAUCCGCAUTT
ACSL4 siRNA1	GUAUGUAUCUCUUGGGAAATT	UUUCCCAAGAGAUACAUACTT
ACSL4 siRNA2	CCAUGAAAUUGGAGCGAUUTT	AAUCGCUCCAAUUUCAUGGTT
ACSL4 siRNA3	CGGAAAUCAUGGAUAGAAUTT	AUUCUAUCCAUGAUUUCCGTT
SCD1 siRNA1	CCCACCUACAAGGAUAAGGAATT	UUCCUUAUCCUUGUAGGUGGGTT
SCD1 siRNA2	CUACGGCUCUUUCUGAUCAUUTT	AAUGAUCAGAAAGAGCCGUAGTT
SCD1 siRNA3	GCACAUCAACUUCACCACAUUTT	AAUGUGGUGAAGUUGAUGUGCTT
LCN2 siRNA1	UGUCCCAAUCGACCAGUGUAUTT	AUACACUGGUCGAUUGGGACATT
LCN2 siRNA2	CCAGCAUGCUAUGGUGUUCUUTT	AAGAACACCAUAGCAUGCUGGTT
LCN2 siRNA3	GCCACCAUCUAUGAGCUGAAATT	UUUCAGCUCAUAGAUGGUGGCTT
