# Supplementary material for: Glutamine Synthetase Shields Triple-negative Breast Cancer Cells from Ferroptosis in Metastasis Triggered by Glutamine Deprivation
Source: Research Square preprint supplement (doi:10.21203/rs.3.rs-6439513/v1), 2025-04-30
Supplement: Supplementary file 6 [file e7eae0b23e83131e36e21872.xlsx]

## Sheet: Sheet1
Primer compositions
Name	Forward (5＇-3＇)	Reverse (5＇-3＇)
ATF4	CCCGCCCACAGATGTAGTTT	CCCGCCCACAGATGTAGTTT
NUPR1	GCCTATGCCCACTTCACCTC	CAGCTTCTCTCTTGGTGCGA
LCN2	CTGAGTGCACAGGTGCCG	TTTAGCAGACAAGGTGGGGC
TFRC	ACCCATTCGTGGTGATCAAT	CGTTTCCAACTGCCCTATGA
GAPDH	ACCCAGAAGACTGTGGATGG	TCTAGACGGCAGGTCAGGTC
